# Supplementary material for: Bottom-up development of national obstetric guidelines in middle-income country Suriname
Source: PubMed Central journal article supplement (PMC6734520; doi:10.1186/s12913-019-4377-6), 2019-09-09
Supplement: 12913_2019_4377_MOESM1_ESM.pdf [file 12913_2019_4377_MOESM1_ESM.pdf]

## Questionnaire on HDP and PPH practice in your hospital

Dear health care provider,

We kindly ask you to complete the following questionnaire for the purpose of a national assessment of the current management of hypertensive disorders in pregnancy and post partum hemorrhage. The completion of this questionnaire contributes to making the best possible national obstetric guidelines on these disorders. We would like your evaluation and feedback in all honesty.

Thank you for your contribution,

The maternal mortality committee

---

Age: ...  
Sex: male / female  
Professional: gynecologist / resident / intern / midwife / nurse / student  
Years experience: ...  
Hospital: I / II / III / IV / primary health care / private sector  
Department: Delivery rooms / maternity ward / outpatient clinic / emergency department

### **General**

1. Would you like national obstetric guidelines?

yes       maybe       no

2. Would you like to help create the national obstetric guidelines?

yes       maybe       no

3. Where would you like to find the national obstetric guidelines?

delivery room       guideline book       website

4. Does your hospital have a local protocol on PPH or HDP?

yes, both       only HDP       only PPH       neither

***Please answer the following questions according to the local reality in your institution.***

***Please use the space on this page to give additional comments and suggestions.***

## **Post partum hemorrhage (PPH)**

### **Definitions**

1. Is there a clear definition for PPH?

- yes, > 1 liter
- yes, but the definition is as follows:
- no

2. Is there a clear definition for severe PPH?

- yes, > 1 liter
- yes, but the definition is as follows:
- no

3. Is it clear when you should alarm the doctor or your supervisor?

- yes, it is clear
- no clear rules

### **Prevention**

4. Is oxytocin generally used in all caesarean sections?

- yes
- no

5. Is oxytocin generally used in all vaginal deliveries?

- yes
- only in the case of risk factors
- no

6. Is controlled cord traction performed?

- yes
- I do not know what that is
- no

### **Blood loss measurement**

7. How is blood loss measured?

- in a measuring cup
- on a scale

8. What do you measure?

- everything, all the blood
- I throw away the first bit as it also contains amniotic fluid
- only the cloths

### **Medical treatment**, in ongoing blood loss >500mL

9. Do you ever provide a second shot of oxytocin (i.v. or i.m.)

- yes
- only in infusion with crystalloid
- no

10. Do you treat her with oxytocin in crystalloids?

- yes
- no

11. Do you ever give additional misoprostol?

- yes
- no

12. Do you ever give additional Methergine?

- yes
- no

13. Do you ever give Tranexamic acid?

- yes
- no

### **Supportive treatment**, in ongoing blood loss >500mL

14. Do you place a second i.v. line?

- yes
- only when necessary (for instance instable patient)
- no

15. Do you give crystalloids (sodium chloride / ringers lactate) for resuscitation?

- yes
- no

16. Do you give colloids (Gelofusin) for resuscitation?

- yes
- no

17. Do you give oxygen?

- yes
- no

### **Blood transfusion in PPH**

18. Are clear guidelines available for blood transfusion?

- yes
- no

19. When is blood transfusion generally given?

- Hb < 4 mmol/L
- Hb < 3.5 mmol/L and Ht < 0.20
- Hb < 5 mmol/L
- Persistent blood loss

20. In what ratio are packed cells and fresh frozen plasma transfused?

- 1 : 1
- 2 : 1
- 1 : 2
- Other, ...

### **Other**

21. Is a PPH box available with all necessary equipment?

- yes
- no

22. Have you ever used an intra-uterine balloon, B-lynch or uterine pack?

- yes
- no

23. Have you ever used a vaginal tampon?

- yes
- no

24. Does your facility perform a hysterectomy for severe PPH?

- yes
- no

25. Do you ever use the early warning score system (EWS / MEOWS)?

- yes
- no

## **Hypertensive disorders of pregnancy (HDP)**

### **Definitions**

1. Do you have a clear definition for pre-eclampsia?

- yes
- no

2. And for severe pre-eclampsia?

- yes
- no

3. And for eclampsia?

- yes
- no

### **Prevention**

4. Do you and your colleagues know the most important risk factors for HDP?

- yes
- no

5. Does your facility give aspirin prevention?

- yes
- no

6. Does your facility give calcium prevention?

- yes
- no

### **Medical treatment**

7. What is the 1<sup>st</sup> – 4<sup>th</sup> choice oral medication choice?

- methyldopa (Aldomet)
- hydralazine (Apresoline)
- nifedipine (Adalat)
- labetalol

Please note #1, #2, #3, #4 of most prescribed

8. What is the 1<sup>st</sup> – 4<sup>th</sup> choice i.v. medication choice?

- hydralazine in direct shots
- hydralazine in perfusor
- labetalol (Trandate)
- ketanserin

Please note #1, #2, #3, #4 of most prescribed

### **Magnesiumsulfate**

9. Does your facility always give a loading dose?

- yes
- no

10. What is the loading dose?

- 1-2 grams in 30 minutes
- 4-6 grams in 30 minutes
- other:

11. What is the maintenance dose?

- 1 gram per hour
- ½ gram per hou
- other:

12. What is the duration of treatment? At least ...

- 6 - 12 hours
- 24 - 48 hours
- other:

13. At what blood pressure threshold is MgSO<sub>4</sub> initiated?

- RR systolic:
- RR diastolic:

14. When a seizure occurs a few hours after initiation of MgSO<sub>4</sub>, do you ...

- double MgSO<sub>4</sub> dose to 2 grams per hour
- repeat bolus with 2 grams in 5 minutes
- other:

15. In eclampsia what medication is given first?

- magnesium sulfate
- diazepam
- antihypertensives
- other:

### **Stabilization of severe pre-eclampsia / eclampsia**

16. When is pregnancy terminated in eclampsia?

- as soon as the patient is stable enough
- at least 48 hours after initiation of MgSO<sub>4</sub>

17. From what gestational age is the pregnancy terminated by caesarean section if necessary?

- 27 weeks
- 30 weeks
- 32 weeks
- 34 weeks

### **Other**

18. Is a HDP box available with all necessary equipment?

- yes
- no

19. Is oxygen given via non-rebreathing mask to a woman experiencing a seizure (eclampsia)?

- yes
- no

20. How many intravenous lines do you give a woman with severe pre-eclampsia or eclampsia?

- always one at least
- always two at least

21. Do you give patient fluids before initiation of magnesium sulfate?

- yes, at least 500mL
- yes, at least 1000mL
- no

22. Does a woman with pre-eclampsia or eclampsia have a fluid restriction?

- yes, .... mL per day
- no

23. Do you ever use the early warning score system (EWS / MEOWS)?

- yes
- no
