# Supplementary material for: Bottom-up development of national obstetric guidelines in middle-income country Suriname
Source: PubMed Central journal article supplement (PMC6734520; doi:10.1186/s12913-019-4377-6), 2019-09-09
Supplement: 12913_2019_4377_MOESM3_ESM.pdf [file 12913_2019_4377_MOESM3_ESM.pdf]

**Hypertensive disorders of pregnancy**  
**Summary of definitions, prevention and management of four international guidelines**

|                        | WHO guideline (2011)                                                                                                                                                                                             | ACOG-guideline (2013)                                                                                                                                                                                                                                                                                                             | Queensland Brisbane (2016)                                                                                                                                                                                                                                                                                                       | NVOG-guideline (2011)                                                                                                                                                                                                                                 |
|------------------------|------------------------------------------------------------------------------------------------------------------------------------------------------------------------------------------------------------------|-----------------------------------------------------------------------------------------------------------------------------------------------------------------------------------------------------------------------------------------------------------------------------------------------------------------------------------|----------------------------------------------------------------------------------------------------------------------------------------------------------------------------------------------------------------------------------------------------------------------------------------------------------------------------------|-------------------------------------------------------------------------------------------------------------------------------------------------------------------------------------------------------------------------------------------------------|
| <b>Definition</b>      |                                                                                                                                                                                                                  |                                                                                                                                                                                                                                                                                                                                   |                                                                                                                                                                                                                                                                                                                                  |                                                                                                                                                                                                                                                       |
| <b>- Pre-eclampsia</b> | Onset of new episode of hypertension during pregnancy (persistent diastolic BP $\geq$ 90 mm Hg) with substantial proteinuria ( $>0.3$ g/day)                                                                     | BP systolic $\geq$ 140 and/or diastolic $\geq$ 90 mm Hg (measured twice at least 4 hours apart) after GA20 <b>OR</b> BP systolic $\geq$ 160 and/or diastolic $\geq$ 110 mm with either proteinuria <b>OR</b> with severity symptoms                                                                                               | Hypertension (BPs $\geq$ 140 OR BPd $\geq$ 90) after 20 weeks of gestation on 2 or more occasions accompanied by one of the following: proteinuria ( $>30$ mg/mmol), creat $>90$ , oliguria, thrombopenia ( $<100$ ), hemolysis, raised transaminases, DIC, neurological symptoms, pulmonary oedema or fetal growth restriction. | Pregnancy induced hypertension (BP systolic $\geq$ 140 <b>and/or</b> diastolic $\geq$ 90 mm Hg after GA 20, measured twice in women with normal previous BP. BP should be normal within 3 months post partum)<br><br>with proteinuria ( $>0.3$ g/day) |
| <b>- Severe PE</b>     | Severe hypertension (not defined), heavy proteinuria or substantial maternal organ dysfunction. Early onset (before 32-34 weeks) and fetal morbidity are used as independent severity criteria in some countries | Systolic $\geq$ 160 or diastolic $\geq$ 110 mm Hg (measured twice at least 4 hours apart while patient is on bed) <b>AND</b> thrombopenia $<100$ <b>OR</b> impaired liverfunction or epigastric pain <b>OR</b> impaired renal function (creatinine 2x normal) <b>OR</b> pulmonary oedema <b>OR</b> cerebral/ visual disturbances. | [Magpie Trial] BPs $\geq$ 170 or BPd $\geq$ 110 mm Hg <b>AND</b> 3+ proteinuria <b>OR</b> BPs $\geq$ 150 or BPd $\geq$ 100 mm Hg <b>AND</b> 2+ proteinuria <b>AND</b> 2 severity symptoms <b>OR</b> pre-eclampsia with at least one sign of central nervous system irritability                                                  | Systolic $\geq$ 160 or diastolic $\geq$ 110 mm Hg <b>OR</b> clinical symptoms of pre-eclampsia (headache, upper-abdominal pain, nausea) <b>OR</b> proteinuria $>5$ g / 24 hours. [Proteinuria can remain absent]                                      |
| <b>- Eclampsia</b>     | Generalized seizures in addition to pre-eclampsia criteria                                                                                                                                                       | New-onset grand mal seizures in a woman with pre-eclampsia                                                                                                                                                                                                                                                                        | One or more seizures superimposed on PE (HT/proteinuria may be absent)                                                                                                                                                                                                                                                           | <b>Not specified</b>                                                                                                                                                                                                                                  |
| <b>Prevention</b>      |                                                                                                                                                                                                                  |                                                                                                                                                                                                                                                                                                                                   |                                                                                                                                                                                                                                                                                                                                  |                                                                                                                                                                                                                                                       |
| <b>- Calcium</b>       | When low calcium intake ( $<900$ mg/ day)                                                                                                                                                                        | In populations with low calcium intake                                                                                                                                                                                                                                                                                            | In high risk women with low calcium intake                                                                                                                                                                                                                                                                                       | <b>Not specified</b>                                                                                                                                                                                                                                  |
| <b>- Aspirin</b>       | 75mg/ day in high risk women, initiate GA $<20$ weeks                                                                                                                                                            | In high risk women, start 60-80 mg daily in late first trimester                                                                                                                                                                                                                                                                  | Moderate to high risk of PE; 100mg/day, initiate $<16$ weeks. Until 37 weeks or birth of baby (NNT 42)                                                                                                                                                                                                                           | <b>Not specified</b>                                                                                                                                                                                                                                  |

|                                                                                                                                                                                                                                                  | WHO guideline (2011)                                                                                                        | ACOG-guideline (2013)                                                                     | Queensland Brisbane (2016)                                                                                                                 | NVOG-guideline (2011)                                                                         |
|--------------------------------------------------------------------------------------------------------------------------------------------------------------------------------------------------------------------------------------------------|-----------------------------------------------------------------------------------------------------------------------------|-------------------------------------------------------------------------------------------|--------------------------------------------------------------------------------------------------------------------------------------------|-----------------------------------------------------------------------------------------------|
| <b>Medical treatment</b>                                                                                                                                                                                                                         |                                                                                                                             |                                                                                           |                                                                                                                                            |                                                                                               |
| <b>Antihypertensive</b>                                                                                                                                                                                                                          |                                                                                                                             |                                                                                           |                                                                                                                                            |                                                                                               |
| -- Initiation                                                                                                                                                                                                                                    | Not specified                                                                                                               | Persistent BP systolic $\geq$ 160 mm Hg <b>OR</b> diastolic $\geq$ 110 mm Hg              | BP systolic $\geq$ 160 <b>OR</b> diastolic $\geq$ 100 mm Hg                                                                                | Systolic $\geq$ 160 <b>OR</b> diastolic $\geq$ 110 mm Hg                                      |
| -- Drug choice                                                                                                                                                                                                                                   | Hydralazine, methyldopa, labetalol, nifedipine, ketanserin, and others are compared. No preference or clear recommendation. | Labetalol, nifedipine, methyldopa                                                         | Oral: methyldopa, labetalol, oxyprenolol, hydralazine, nifedipine, prazosin, clonidine. I.V. nifedipine, hydralazine, labetalol, diazoxide | Methyldopa, labetalol, nifedipine                                                             |
| <b>Magnesium sulfate</b>                                                                                                                                                                                                                         |                                                                                                                             |                                                                                           |                                                                                                                                            |                                                                                               |
| -- Indication                                                                                                                                                                                                                                    | Eclampsia; severe PE                                                                                                        | Eclampsia; severe PE                                                                      | Eclampsia; HELLP; severe PE; neuroprotection                                                                                               | Eclampsia; severe PE, consider in mild pre-eclampsia                                          |
| -- Loading dose                                                                                                                                                                                                                                  | Not specified                                                                                                               | 4-6 (time ?)                                                                              | 4 g IV in 20 min                                                                                                                           | 4-6 g in 10-30 min                                                                            |
| -- Maintenance                                                                                                                                                                                                                                   | Not specified                                                                                                               | 1-2 g per hour                                                                            | 1 g per hour                                                                                                                               | 1 g in 60 min                                                                                 |
| -- 2nd seizure                                                                                                                                                                                                                                   | Not specified                                                                                                               | No specific recommendations                                                               | 2 g in 5 min (may repeat after 2 min) Other possibilities: diazepam 5-10mg IV (2-5mg/min), midazolam 5-10 mg IV in 2-5min                  | 2 g in 5 min (max. twice) Other possibilities: lorazepam 4mg i.v. slowly, sedate and intubate |
| -- Stop treatment                                                                                                                                                                                                                                | Not specified                                                                                                               | At least 24 hours after last convulsion                                                   | At least 24 hours after birth or last seizure                                                                                              | At least 24 hours after initiation                                                            |
| <b>Other</b>                                                                                                                                                                                                                                     |                                                                                                                             |                                                                                           |                                                                                                                                            |                                                                                               |
| Corticosteroids                                                                                                                                                                                                                                  | Not specified                                                                                                               | GA <34 weeks                                                                              | GA <34 weeks                                                                                                                               | GA <34, birth expected in 2-10 days; Betamethason 12mg i.m. 2x (24hr apart)                   |
| Vital signs                                                                                                                                                                                                                                      | Not specified                                                                                                               | Every 8 hours                                                                             | At least every 4 hours                                                                                                                     | Not specified                                                                                 |
| Fluids                                                                                                                                                                                                                                           | Not specified                                                                                                               | Not specified                                                                             | No large volumes of fluids. Restrict to 1.5L/24 hrs after birth. Strict fluid balance                                                      | Not specified                                                                                 |
| Delivery timing in severe PE                                                                                                                                                                                                                     | Unviable: induction. Term: delivery asap Before term: expectant unless uncontrolled hypertension or fetal distress          | Depends on severity; GA and NICU-facility. Deliver should be shortly after stabilisation. | Stabilize (control hypertension, correct coagulopathy, initiate MgSO <sub>4</sub> , control fluids) and deliver                            | Not specified                                                                                 |
| Post partum medication                                                                                                                                                                                                                           | Not specified. Severe post partum hypertension; in all women treated antenatally                                            | Not specified. Initiate when BP systolic $\geq$ 150 <b>OR</b> diastolic $\geq$ 100 mm Hg. | Avoid abrupt withdrawal of antihypertensives. Cease methyldopa (depression). Consider nifedipine.                                          | Not specified                                                                                 |
| Other recommendations                                                                                                                                                                                                                            | Not specified                                                                                                               | No NSAIDs, promote breastfeeding. Consider postnatal counseling.                          | Consider VTE prophylaxis (during admission); postnatal counseling. Follow-up 6 weeks                                                       | Not specified                                                                                 |
| <i>Legend: BP = blood pressure, GA = gestational age, HT = hypertension, IV = intravenous, MgSO<sub>4</sub> = magnesium sulfate, NNT = number needed to treat, VTE = venous thrombo-embolism, NSAID = non-steroidal anti-inflammatory drugs.</i> |                                                                                                                             |                                                                                           |                                                                                                                                            |                                                                                               |

## Postpartum hemorrhage

### Summary of definitions, risk factors, prevention and resuscitation of four international guidelines

|                                                                                                                                                                                                                                 | WHO-guideline (2011)                                           | ACOG-guideline (2013)                                                                   | RCOG-guideline (2014)                                                                             | NVOG-guideline (2011)                                                                          |
|---------------------------------------------------------------------------------------------------------------------------------------------------------------------------------------------------------------------------------|----------------------------------------------------------------|-----------------------------------------------------------------------------------------|---------------------------------------------------------------------------------------------------|------------------------------------------------------------------------------------------------|
| <b>Definition</b>                                                                                                                                                                                                               | PPH: >500mL<br>Severe PPH >1 L                                 | Vaginal > 500mL<br>Caesarean >1 L                                                       | Minor: >500mL<br>Moderate: 1-2 L<br>Major: >2 L                                                   | Vaginal > 500mL<br>Caesarean >1 L                                                              |
| <b>Incidence</b>                                                                                                                                                                                                                | 2%                                                             | 4-6%                                                                                    | 3.7/1000 (> 5 PC)                                                                                 | 3.8% (2003)<br>6.2% (2009)                                                                     |
| <b>Risk factors</b>                                                                                                                                                                                                             | Minimally described                                            | Elaborately described                                                                   | Elaborately described with odds ratio                                                             | Elaborately described                                                                          |
| <b>Prevention</b>                                                                                                                                                                                                               | AMTSL<br>(CCT after 30 min)                                    | Not discussed                                                                           | AMTSL<br>Placenta location                                                                        | AMTSL                                                                                          |
| - Oxytocin                                                                                                                                                                                                                      | 10 IU i.m. / i.v. in all births                                | <b>Not specified</b>                                                                    | Oxytocin 5 or 10 IU i.m.<br>5 IE i.v. (Caesarean)<br>Ergometrin 0.5 mg i.m.<br>Combined if Hb low | Oxytocin 5 or 10 IU i.m.<br>5 IE i.v. (Caesarean)<br>followed by 10 IU i.v. in 4 hours         |
| <b>Resuscitation</b>                                                                                                                                                                                                            |                                                                |                                                                                         |                                                                                                   |                                                                                                |
| - Access                                                                                                                                                                                                                        | <b>Not specified</b>                                           | Ample intravenous access                                                                | Intravenous access 2x                                                                             | Intravenous access 2x                                                                          |
| - Fluids                                                                                                                                                                                                                        | Crystalloids                                                   | Crystalloids                                                                            | Crystalloids, warm/ rapid<br>Max. 2 L (+ 1.5L colloids)                                           | Crystalloids, warm/ rapid<br>(1 : 1 blood loss)                                                |
| - Oxygen                                                                                                                                                                                                                        | <b>Not specified</b>                                           | 10-15 L per minute                                                                      | 10-15 L / min over NRM                                                                            | <b>Not specified</b>                                                                           |
| - Blood products                                                                                                                                                                                                                | <b>Not specified</b>                                           | Blood as needed and blood bank notification                                             | As soon as possible<br>6 PC : 4 FFP                                                               | 4 PC : 4 FFP                                                                                   |
| - Uterine massage                                                                                                                                                                                                               | Recommended, continuously. Bimanual, aorta compression advised | <b>Not specified</b>                                                                    | <b>Not specified</b>                                                                              | Recommended, continuously                                                                      |
| - Coagulation screening                                                                                                                                                                                                         | Blood loss up to 1500mL or >2 uterotonics                      | <b>Not specified</b>                                                                    | >1L blood loss                                                                                    | >1L blood loss or >2L cristalloids                                                             |
| <b>Medical treatment</b>                                                                                                                                                                                                        |                                                                |                                                                                         |                                                                                                   |                                                                                                |
| - Oxytocin infusion                                                                                                                                                                                                             | Recommended                                                    | 10-40 IU i.v. or 10 IU i.m.                                                             | 5 IU i.v. may repeat or 40 IU in 500mL à 4 hrs                                                    | 10 IU i.v. followed by 10 IU i.v. à 4 hrs                                                      |
| - Misoprostol                                                                                                                                                                                                                   | If oxytocin not available: 600ug oral or 800ug sublingual      | 800-1000ug rectal                                                                       | 1000 ug rectal                                                                                    | Not recommended                                                                                |
| - Ergots                                                                                                                                                                                                                        | If oxytocin not available<br>Not in retained placenta          | Methyl-ergonovine 0.2 mg i.m. every 2-4 hr                                              | Ergometrine 0.5mg i.m. or i.v.                                                                    | Metergin 0.2mg i.m or i.v.                                                                     |
| - Others                                                                                                                                                                                                                        | <b>Not specified</b>                                           | Carboprost 0.25mg i.m.<br>Dinoprostone 20mg PV<br>Factor VIIa 50-100ug/kg every 2 hours | Carboprost 0.25mg i.m. (max 8 doses)                                                              | Sulproston 500 ug / 30 mins (followd by 60-120 ug per hour). Fibrinogen 2g (in >2L blood loss) |
| - Tranexamic Acid                                                                                                                                                                                                               | Recommended in case of persistent bleeding                     | <b>Not specified</b>                                                                    | Not recommended                                                                                   | Recommended, 1-2 g                                                                             |
| - Antibiotic prophylaxis in MPR                                                                                                                                                                                                 | Ampicillin or cefazolin                                        | <b>Not specified</b>                                                                    | <b>Not specified</b>                                                                              | Cefazolin/metronidazol or amoxicillin/clav. acid                                               |
| <b>Surgical treatment</b>                                                                                                                                                                                                       |                                                                |                                                                                         |                                                                                                   |                                                                                                |
| - Uterine packing                                                                                                                                                                                                               | Not recommended                                                | 4-inch gauze 5000U thrombin in 5mL saline                                               | Not recommended                                                                                   | Not recommended                                                                                |
| - Balloon tamponade                                                                                                                                                                                                             | Refractory bleeding/<br>Uterotonics unavailable                | Foley (60-80mL)<br>Bakri (300-500mL)                                                    | Leave for 4-6 hrs                                                                                 | In refractory bleeding<br>Bakri (300-500mL)                                                    |
| - Brace suture                                                                                                                                                                                                                  | <b>Not specified</b>                                           | B-Lynch, square                                                                         | B-Lynch, square                                                                                   | B-Lynch, square                                                                                |
| - Vessel ligation                                                                                                                                                                                                               | Uterine and iliac artery                                       | Uterine and iliac artery                                                                | Uterine and iliac artery                                                                          | <b>Not specified</b>                                                                           |
| - Embolization                                                                                                                                                                                                                  | If bleeding stable                                             | <b>Not specified</b>                                                                    | Yes, consider                                                                                     | Yes, consider                                                                                  |
| - Hysterectomy                                                                                                                                                                                                                  | In refractory bleeding despite vessel ligation                 | <b>Not specified</b>                                                                    | Rather sooner than later                                                                          | In case of placenta accreta, uterine rupture or Jehova's witnesses                             |
| <i>Legend: AMTSL = active management of the third stage of labor. CCT = controlled cord traction. FFP = fresh frozen plasma. Hb = hemoglobin. MPR = manual placenta removal. NRM = non-rebreathing mask. PC = packed cells.</i> |                                                                |                                                                                         |                                                                                                   |                                                                                                |
