# Supplementary material for: Bottom-up development of national obstetric guidelines in middle-income country Suriname
Source: Springer Nature journal article supplement (doi:10.1186/s12913-019-4377-6), 2019-09-09
Supplement: MOESM2 [file 17153466]

## Hypertensive disorders in pregnancy – The variation in practice between the four hospitals in Paramaribo - Suriname

|                   | Hospital A (2016)                                                              | Hospital B (2016)                                                                                                                                              | Hospital C (2016)                                                                                                                                                                                            | Hospital D (2016)                                                                                                         | The final national guideline                                                                                                          |                                                                                                                                                                  |
|-------------------|--------------------------------------------------------------------------------|----------------------------------------------------------------------------------------------------------------------------------------------------------------|--------------------------------------------------------------------------------------------------------------------------------------------------------------------------------------------------------------|---------------------------------------------------------------------------------------------------------------------------|---------------------------------------------------------------------------------------------------------------------------------------|------------------------------------------------------------------------------------------------------------------------------------------------------------------|
| Definitions       | <b>Pre-eclampsia</b>                                                           | BPs ≥ 140 mm Hg <b>AND/OR</b> BPd ≥ 90 mm Hg (measured twice at least 4 hours apart) <b>OR</b> BPd ≥ 110 mm Hg; all after GA 20 weeks; <b>with</b> proteinuria | BPd ≥ 90 (measured twice at least 4 hours apart) <b>OR</b> BPd ≥ 110 <b>OR</b> increase of BP 15-20 compared to pre-pregnancy BP; all after GA 20 weeks; <b>with</b> proteinuria <b>OR</b> clinical symptoms | BPs ≥ 140 <b>AND/OR</b> BPd ≥ 90 (twice; interval 4h) <b>OR</b> BPd ≥ 110; all after GA 20 weeks; <b>with</b> proteinuria | BPs ≥ 140 <b>AND/OR</b> BPd ≥ 90 mm Hg (twice; interval 4h) <b>OR</b> BPd ≥ 110 mm Hg; all after GA 20 weeks; <b>with</b> proteinuria | BPs ≥ 140 mm Hg <b>AND/OR</b> BPd ≥ 90 (2x, interval 4–6h) <b>OR</b> increase BPs >30 <b>OR</b> BPd >15 mmHg <b>with</b> proteinuria <b>OR</b> clinical symptoms |
|                   | <b>Severe pre-eclampsia</b>                                                    | Pre-eclampsia with BP diastolic ≥ 110 mm Hg with clinical symptoms                                                                                             | <b>Not specified</b>                                                                                                                                                                                         | Pre-eclampsia with BP diastolic ≥ 110 mm Hg <b>OR</b> clinical symptoms                                                   | <b>Not specified</b>                                                                                                                  | BPd ≥ 110 mmHg (once) <b>with</b> proteinuria <b>OR</b> organ dysfunction (renal, liver, hematological, neurological, pulmonary)                                 |
|                   | <b>Eclampsia</b>                                                               | Generalized tonic-clonic seizures, with no other cause than pre-existent pre-eclampsia                                                                         | Convulsion in a pre-eclamptic patient with no other cause                                                                                                                                                    | Convulsion in a pre-eclamptic patient with no other cause                                                                 | Convulsion in a pre-eclamptic patient with no other cause                                                                             | Tonic-clonic seizures with no other attributable cause than pre-eclampsia                                                                                        |
| Hypertensive      | <b>Calcium</b>                                                                 | No                                                                                                                                                             | History of IUGR or pre-eclampsia                                                                                                                                                                             | No                                                                                                                        | No                                                                                                                                    | Low intake → 2 grams in 2-3 trimester                                                                                                                            |
|                   | <b>Aspirine</b>                                                                | Chronic hypertension or medical history of IUGR or IUGR due to pre-eclampsia                                                                                   | History of IUGR or pre-eclampsia                                                                                                                                                                             | No                                                                                                                        | No                                                                                                                                    | High risk → 100mg in GA 16-37                                                                                                                                    |
|                   | <b>Admission criteria</b>                                                      | BPs ≥ 160 <b>AND/OR</b> BPd ≥ 110 <b>AND/OR</b> clinical symptoms                                                                                              | <b>Not specified</b>                                                                                                                                                                                         | <b>Not specified</b>                                                                                                      | <b>Not specified</b>                                                                                                                  | Severe PIH (persistent BPs ≥ 150/100), pre-eclampsie / HELLP / eclampsia, foetal indication                                                                      |
|                   | <b>Oral initiation</b>                                                         | BPd ≥ 100                                                                                                                                                      | <b>Not specified</b>                                                                                                                                                                                         | BPd ≥ 100 mm Hg (twice)                                                                                                   | BPd ≥ 100 <b>OR</b> BP increase >20                                                                                                   | BPs ≥ 150 <b>OR</b> BPd ≥ 100                                                                                                                                    |
|                   | <b>Parenteral initiation</b>                                                   | BPd ≥ 110                                                                                                                                                      | <b>Not specified</b>                                                                                                                                                                                         | BPd ≥ 110 mm Hg                                                                                                           | BP diastolic ≥ 110 mmHg > once                                                                                                        | BPd ≥ 110                                                                                                                                                        |
| Hypertensive      | <b>Oral drug choice</b><br><i>Antepartum</i>                                   | 1. methyldopa 250-750mg 2-3<br>2. hydralazine 25-50 2-3dd                                                                                                      | 1. methyldopa 250-500mg 2-3<br>2. hydralazine 25-50 2-3dd                                                                                                                                                    | 1. methyldopa 250-500mg 2-3<br>2. hydralazine 25-50 2-3dd<br>3. labetalol 100-200mg 2dd<br>nifedipine 20mg 2dd            | 1. methyldopa 250-500mg 2-3<br>2. hydralazine 25-50 2-3dd                                                                             | 1. methyldopa 250-1000mg 3-4dd<br>2. hydralazine 25-75mg 3dd<br>3. labetalol 50-200mg 3dd<br>nifedipine 5-40mg 3dd                                               |
|                   | <i>Postpartum</i>                                                              | nifedipine 20mg 2dd                                                                                                                                            | nifedipine 20mg 2dd                                                                                                                                                                                          | nifedipine 20mg 2dd                                                                                                       | nifedipine 20mg 2dd                                                                                                                   | nifedipine 5-40mg 3dd                                                                                                                                            |
|                   | <b>Parenteral drug choice</b>                                                  | 1. hydralazine via perfusor<br>2. hydralazine 5mg i.v.<br>3. ketanserin or labetalol<br>Perfusor available                                                     | 1. hydralazine via perfusor<br>2. hydralazine 5mg i.v.<br>3. labetalol<br>Perfusor available only in ICU                                                                                                     | 1. hydralazine via perfusor<br>2. hydralazine 5mg i.v.<br>Perfusor available                                              | hydralazine 5mg i.v.<br>Perfusor not available                                                                                        | 1. hydralazine 5-10mg à 20-40 min. <b>OR</b> by infusion system<br>2. labetalol 1-2 mg/kg in 20 min. Continue 20-70mg/hr.                                        |
| MgSO <sub>4</sub> | <b>Indication</b>                                                              | Eclampsia; severe pre-eclampsia; neuroprotection                                                                                                               | Eclampsia; pre-eclampsia                                                                                                                                                                                     | Eclampsia; severe pre-eclampsia                                                                                           | Eclampsia; severe pre-eclampsia; pre-eclampsia with symptoms                                                                          | Eclampsia; severe pre-eclampsia (BPd ≥ 110 <b>OR</b> clinical symptoms); neuroprotection                                                                         |
|                   | <b>Loading dose</b>                                                            | 4 grams / 30 minutes                                                                                                                                           | 2 grams / 30 minutes                                                                                                                                                                                         | 4-6 grams / 30 minutes                                                                                                    | 1 gram / 30 minutes                                                                                                                   | 4-6 grams / 30 minutes                                                                                                                                           |
|                   | <b>Maintenance dose</b>                                                        | 1 gram / hour                                                                                                                                                  | 1 gram / hour                                                                                                                                                                                                | 1 gram / hour                                                                                                             | 1 gram / hour                                                                                                                         | 1 gram / hour                                                                                                                                                    |
|                   | <b>Dose repeated seizure</b>                                                   | 2 grams / 5 minutes                                                                                                                                            | None (diazepam)                                                                                                                                                                                              | None (diazepam)                                                                                                           | None (diazepam)                                                                                                                       | 2 grams / 5 minutes                                                                                                                                              |
|                   | <b>Stop treatment</b>                                                          | After 48 hours                                                                                                                                                 | After 24 hours and stable                                                                                                                                                                                    | After 48 hours                                                                                                            | After 48 hours and stable                                                                                                             | 24 – 48 hours (max 7 days; measure plasma-MgSO <sub>4</sub> )                                                                                                    |
|                   | <b>Diazepam indication</b>                                                     | If no iv-access                                                                                                                                                | If no iv-access or in repeated seizure                                                                                                                                                                       | If no iv-access or in repeated seizure                                                                                    | In seizures (whether or not on MgSO <sub>4</sub> )                                                                                    | If no iv-access; when MgSO <sub>4</sub> shot given twice                                                                                                         |
| Fluids            | <b>Oxygen</b>                                                                  | Eclampsia: 10 L NRM                                                                                                                                            | No                                                                                                                                                                                                           | Eclampsia: 5-10 L NRM                                                                                                     | No                                                                                                                                    | Eclampsia: 15 L NRM                                                                                                                                              |
|                   | <b>Intravenous access</b>                                                      | 1 in pre-eclampsia; 2 in eclampsia                                                                                                                             | 1 in pre-eclampsia and eclampsia                                                                                                                                                                             | 1 in pre-eclampsia; 2 in eclampsia                                                                                        | 1 in pre-eclampsia and eclampsia                                                                                                      | 2                                                                                                                                                                |
|                   | <b>Before i.v. drugs</b>                                                       | 500mL NaCl 0.9% quick<br>500mL Ringers à 8 hours (no gelofusine, glucose/NaCl 0.9%, glucose 5%)                                                                | 1000mL gelofusine quick<br>500mL glucose/NaCl 0.9% à 6 hours                                                                                                                                                 | 500mL Ringers <b>OR</b> gelofusine<br>First 1000mL Ringers in 6 hours, then 500mL gluc/NaCl 0.9% à 8 hours                | No fluids<br>500mL Ringers <b>OR</b> NaCl 0.9% à 8 hours                                                                              | No fluids<br>Max. 1500mL in 24 hours.<br>Preference for Ringer's Lactate or NaCl 0.9%                                                                            |
| Monitoring        | <b>Vital signs</b><br><i>RR &lt;110</i><br><i>RR ≥ 110 OR MgSO<sub>4</sub></i> | Every 6 hours<br>4x once per hour, then every 4 hours                                                                                                          | Every 4 hours<br>Every 2-3 hours                                                                                                                                                                             | Every 2-3 hours<br>4x every ½ hour, 4x every hour                                                                         | Every 6 hours<br>Every 4 hours                                                                                                        | Every 4 hours (intrapartum every ½ hour)<br>Every ½ hr (4x), 1hr (4x), 2 hrs (4x), 4 hrs (4x)                                                                    |
|                   | <b>Fluid balance</b>                                                           | Pre-eclampsia                                                                                                                                                  | Pre-eclampsia / HELLP                                                                                                                                                                                        | Severe pre-eclampsia                                                                                                      | Pre-eclampsia                                                                                                                         | Every admission of hypertensive disorders                                                                                                                        |
|                   | <b>Blood tap</b>                                                               | 2x per week                                                                                                                                                    | 2x per week                                                                                                                                                                                                  | 2x per week                                                                                                               | 3-4x per week                                                                                                                         | 2x per week                                                                                                                                                      |
|                   | <b>Doppler</b>                                                                 | GA <27                                                                                                                                                         | GA <34                                                                                                                                                                                                       | GA <30                                                                                                                    | GA <30                                                                                                                                | GA <27                                                                                                                                                           |
|                   | <b>CTG</b>                                                                     | GA ≥27                                                                                                                                                         | GA ≥34                                                                                                                                                                                                       | GA ≥30                                                                                                                    | GA ≥30                                                                                                                                | GA ≥27                                                                                                                                                           |
| Delivery          | <b>Corticosteroids</b>                                                         | GA 26 <sup>-5</sup> – 34<br>Dexamethasone 12mg twice; 12hrs                                                                                                    | Severe pre-eclampsia and GA 28-34<br>Dexamethasone 12mg twice; 12hrs                                                                                                                                         | Delivery expected and GA 27-34<br>Dexamethasone 12mg twice; 12hrs                                                         | Severe pre-eclampsia and GA 28-34<br>Dexamethasone 12mg twice; 12hrs                                                                  | GA 26 – 34<br>Dexamethasone 4 x 6mg; 12 hours apart (total 36 hours)                                                                                             |
|                   | <b>Eclampsia box</b>                                                           | In two delivery rooms                                                                                                                                          | Not present                                                                                                                                                                                                  | In one delivery room                                                                                                      | Not present                                                                                                                           | In every delivery room                                                                                                                                           |
|                   | <b>Timing mild PE</b>                                                          | GA 37<br>Induction (balloon, misoprostol)                                                                                                                      | Dependent on gynaecologist<br>Induction (misoprostol) or C-section                                                                                                                                           | GA 37, induction<br>Induction (balloon, misoprostol)                                                                      | GA 37<br>Induction (misoprostol) or C-section                                                                                         | GA 37; preference for vaginal birth with induction (depending on BISHOP → balloon/misoprostol/oxytocine)                                                         |
| Postpartum        | <b>Timing severe PE</b>                                                        | GA ≥27<br>C-section atleast >48 hours of stabilisation                                                                                                         | GA ≥34<br>C-section after stabilisation                                                                                                                                                                      | GA ≥30<br>C-section / induction after stabilisation                                                                       | GA ≥32<br>C-section after stabilisation                                                                                               | GA <27 induction. GA ≥ 27: preference for induction. Caesarian in case of failed induction or fetal indication                                                   |
|                   | <b>Duration of admission</b>                                                   | At least 24 hours post partum                                                                                                                                  | At least 24 hours post partum                                                                                                                                                                                | At least 24 hours post partum                                                                                             | At least 24 hours post partum                                                                                                         | At least 24 hours post partum and stable (BP normalized, urine output normal, lab results improved)                                                              |
|                   | <b>Antihypertensives</b>                                                       | No target BP; switch to nifedipine                                                                                                                             | No target BP; switch to nifedipine                                                                                                                                                                           | No target BP; switch to nifedipine                                                                                        | No target BP; switch to nifedipine                                                                                                    | BPs 130-150 and BPd 80-100; switch to nifedipine                                                                                                                 |
|                   | <b>Blood tap</b>                                                               | If necessary                                                                                                                                                   | One day post partum                                                                                                                                                                                          | If necessary                                                                                                              | Two days post partum                                                                                                                  | One day post partum                                                                                                                                              |
|                   | <b>Postnatal clinic visit</b>                                                  | 7 days                                                                                                                                                         | 7-10 days                                                                                                                                                                                                    | 7 days                                                                                                                    | 7 days                                                                                                                                | 7-10 days and 6 weeks                                                                                                                                            |

## Postpartum hemorrhage – The variation in practice between the four hospitals in Paramaribo - Suriname

|                                                        | Hospital A (2016)                                                                                     | Hospital B (2016)                                                                                                         | Hospital C (2016)                                                                                                                                     | Hospital D (2016)                                                                                                                                     | The final national guideline                                                                                                                                                                                                                                                                                                         |                                                                                                                                                                                                    |
|--------------------------------------------------------|-------------------------------------------------------------------------------------------------------|---------------------------------------------------------------------------------------------------------------------------|-------------------------------------------------------------------------------------------------------------------------------------------------------|-------------------------------------------------------------------------------------------------------------------------------------------------------|--------------------------------------------------------------------------------------------------------------------------------------------------------------------------------------------------------------------------------------------------------------------------------------------------------------------------------------|----------------------------------------------------------------------------------------------------------------------------------------------------------------------------------------------------|
| <b>Definition PPH</b>                                  | 500mL blood loss or more after vaginal delivery                                                       | 500mL blood loss or more after vaginal delivery                                                                           | 500mL blood loss or more after vaginal delivery                                                                                                       | 500mL blood loss or more after vaginal delivery                                                                                                       | 500mL blood loss or more during and after childbirth                                                                                                                                                                                                                                                                                 |                                                                                                                                                                                                    |
| <b>Definition severe PPH</b>                           | 1000mL blood loss or more                                                                             | Not specified                                                                                                             | Not specified                                                                                                                                         | Not specified                                                                                                                                         | 1000mL blood loss or more or blood loss with clinical hypovolemia during and after child birth                                                                                                                                                                                                                                       |                                                                                                                                                                                                    |
| <b>Call for help (supervisor)</b>                      | 500mL blood loss or more (general doctor)<br>1000mL blood loss or more (gynaecologist)                | Not specified                                                                                                             | 500mL blood loss or more                                                                                                                              | 500mL blood loss or more                                                                                                                              | 500mL blood loss or more (call general doctor)<br>1000mL blood loss or more (call gynaecologist)                                                                                                                                                                                                                                     |                                                                                                                                                                                                    |
| <b>Risk factors</b>                                    | Not specified                                                                                         | Prolonged labor, twin pregnancy, macrosomia, high parity, uterus myomatosis                                               | Not specified                                                                                                                                         | Not specified                                                                                                                                         | Risk factors grouped (see guideline for elaboration):<br>- General (e.g. age >40, BMI >35, uterus myomatosis)<br>- Obstetric history (e.g. grande mult, caesarean, etc)<br>- Current pregnancy (macrosomia, pre-eclampsia, etc)<br>- During delivery (prolonged labor, etc)<br>- Post partum (full bladder, retained placenta, etc). |                                                                                                                                                                                                    |
| <b>Prevention</b>                                      | <b>Partograph</b>                                                                                     | On indication (prolonged labor, caesarean in history, on request of physician)                                            | Sometimes                                                                                                                                             | Never                                                                                                                                                 | Never                                                                                                                                                                                                                                                                                                                                | Always recommended                                                                                                                                                                                 |
|                                                        | <b>Oxytocin in the 3<sup>rd</sup> stage of labor</b>                                                  | Caesarean – always<br>Vaginal birth – always (before delivery of placenta)<br>5-10 IU i.m. or slowly i.v. (2 minutes)     | Caesarean – always<br>Vaginal birth – in patients with high-risk for PPH (done after delivery of placenta)<br>5-10 IU i.m. or slowly i.v. (2 minutes) | Caesarean – always<br>Vaginal birth – in patients with high-risk for PPH (done after delivery of placenta)<br>5-10 IU i.m. or slowly i.v. (2 minutes) | Caesarean – always<br>Vaginal birth – in patients with high-risk for PPH (done after delivery of placenta)<br>5-10 IU i.m. or slowly i.v. (2 minutes)                                                                                                                                                                                | Caesarean – always<br>Vaginal birth – always (before delivery of placenta)<br>5-10 IU i.m. or slowly i.v. (2 minutes)                                                                              |
|                                                        | <b>Measurement of blood</b>                                                                           | - Measurement cup (mL)<br>- Liquid (blood) removed from blood clots with a sve. Measurement done of only the blood clots. | - Measurement cup (mL)<br>- Liquid (blood) removed from blood clots with a sieve. Measurement done of only the blood clots.                           | - Measurement cup (mL) and / or scale (kg)<br>- Liquid (blood) and blood clots measured                                                               | - Measurement cup (mL)<br>- Liquid (blood) removed from blood clots with a sieve. Measurement done of only the blood clots.                                                                                                                                                                                                          | - Measurement cup (mL) and / ore scale (kg)<br>- Measure liquid (blood) and bloodclots all together. Subtract the estimated amniotic fluid.                                                        |
| <b>Management</b>                                      | <b>Oxytocin i.m. / i.v.</b>                                                                           | Repeat 5-10 IU shot i.m. or i.v.                                                                                          | 5 IU shot i.m. or i.v.                                                                                                                                | 5 IU shot i.m. or i.v.                                                                                                                                | 10 IU shot i.m. or 5 IU shot i.v.                                                                                                                                                                                                                                                                                                    | 10 IU shot i.m. or i.v.                                                                                                                                                                            |
|                                                        | <b>Oxytocin infusion</b>                                                                              | 10 IU in 500mL / 4-6 hours<br>During at least 24 hours                                                                    | 5 IU in 500mL / 6 hours<br>Until bleeding stops                                                                                                       | 10-20 IU in 500mL / 4 hours<br>During at least 4 hours                                                                                                | 10 IU in 500mL / 4-6 hours<br>Until bleeding stops                                                                                                                                                                                                                                                                                   | 10 IU in 500mL / 4 hours                                                                                                                                                                           |
|                                                        | <b>Misoprostol</b>                                                                                    | 400 – 800 micrograms rectal                                                                                               | 400 – 800 micrograms rectal                                                                                                                           | 400 micrograms rectal                                                                                                                                 | 400 – 800 micrograms rectal                                                                                                                                                                                                                                                                                                          | Not first choice, as misoprostol is not beneficiary when adequate oxyotin dosis is given.                                                                                                          |
|                                                        | <b>Methergin</b>                                                                                      | Not prescribed                                                                                                            | 0.2 mg i.m. if bleeding persists                                                                                                                      | Not prescribed                                                                                                                                        | Not prescribed                                                                                                                                                                                                                                                                                                                       | 0.2 mg i.m.                                                                                                                                                                                        |
|                                                        | <b>Tranexamic acid (Cyclokapron)</b>                                                                  | 1 gr i.v. slowly in persistent bleeding                                                                                   | 2 gr i.v. slowly in severe and persistent bleeding                                                                                                    | 2 gr i.v. slowly in severe and persistent bleeding                                                                                                    | Not prescribed                                                                                                                                                                                                                                                                                                                       | 1 gram i.v. slowly when 1000mL blood loss or more                                                                                                                                                  |
|                                                        | <b>Calcium gluconate</b>                                                                              | 1 gram i.v.<br>After transfusion of 4 blood products                                                                      | 1 gram i.v.<br>After transfusion of 6 blood products                                                                                                  | 1 gram i.v.<br>After transfusion of 4 blood products                                                                                                  | Not prescribed                                                                                                                                                                                                                                                                                                                       | 1 gram i.v.<br>After transfusion of 4 blood products                                                                                                                                               |
| <b>Resuscitation</b>                                   | <b>I.V. access</b>                                                                                    | 2 i.v. access lines (> 1000 mL blood loss)                                                                                | Not specified                                                                                                                                         | Not specified                                                                                                                                         | Not specified                                                                                                                                                                                                                                                                                                                        | 2 x intravenous access (preferably green or grey)                                                                                                                                                  |
|                                                        | <b>Infusion</b>                                                                                       | Ringer's Lactate or Sodium Chloride 0.9%                                                                                  | Ringer's Lactate or Glucose 5%                                                                                                                        | Sodium Chloride 0.9%, Glucose 5% or Gelofusine                                                                                                        | Ringer's Lactate or Sodium Chloride 0.9%                                                                                                                                                                                                                                                                                             | Ringer's Lactate or Sodium Chloride 0.9%<br>Infuse 1 : 1 (blood loss : infusion), max 3 liters                                                                                                     |
|                                                        | <b>Oxygen</b>                                                                                         | 10 L / min in 1000 mL blood loss or more                                                                                  | Sometimes in severe blood loss                                                                                                                        | 10 L / min in 2000 mL blood loss or more                                                                                                              | Sometimes in severe blood loss                                                                                                                                                                                                                                                                                                       | 10 – 15 L / min in 1000 mL blood loss or more                                                                                                                                                      |
|                                                        | <b>Transfusion indication</b>                                                                         | Hb < 4 mmol/L                                                                                                             | Hb < 5 mmol/L                                                                                                                                         | Hb < 3.5 mmol/L or Ht < 0.20                                                                                                                          | Hb < 4.5 mmol/L and complaints                                                                                                                                                                                                                                                                                                       | Hb < 4.0 mmol/L or Ht < 0.20, 1000 mL blood loss or more and persistent or with symptoms of hypovolemic shock                                                                                      |
|                                                        | <b>Blood products ratio</b>                                                                           | 2 PC : 1 FF                                                                                                               | 2 PC : 1 FFP                                                                                                                                          | 1 PC : 2 FFP                                                                                                                                          | 2 PC : 1 FFP                                                                                                                                                                                                                                                                                                                         | 1 PC : 2 FFP (in massa transfusion 4 PC : 4 FFP : 1 TC)                                                                                                                                            |
|                                                        | <b>Surgical and other</b>                                                                             | Vaginal tampon; Hysterectomy                                                                                              | Vaginal tampon; Hysterectomy                                                                                                                          | Vaginal tampon; Hysterectomy                                                                                                                          | Vaginal tampon; Hysterectomy                                                                                                                                                                                                                                                                                                         | Vaginal and uterine packing (gauzes); balloon tamponade (Bakri, Foley, condom); B-lynch; bilateral ligation of uterine (or internal iliac) arteries; hysterectomy (rather sooner than later)       |
| <b>Vital signs</b>                                     | <b>Measurements of</b>                                                                                | Blood pressure, pulse, temperature, blood loss, tone of uterus                                                            | Blood pressure, pulse, temperature, blood loss, tone of uterus                                                                                        | Blood pressure, pulse, temperature, blood loss, tone of uterus                                                                                        | Blood pressure, pulse, temperature, blood loss, tone of uterus                                                                                                                                                                                                                                                                       | Blood pressure, pulse, <b>respiratory rate, saturation</b> , temperature, blood loss, tone of uterus, <b>urinary output</b>                                                                        |
|                                                        | <b>Timing of monitoring</b><br>- after a normal delivery<br>- during hemorrhage<br>- after hemorrhage | Directly; after 1 hour; after 8 hours<br>Not specified<br>Directly; after 1 hour; after 4 hours                           | Directly; after 1 hour; after 8 hours<br>Not specified<br>Directly; after 1 hour; after 8 hours                                                       | Directly; after 1 hour; after 8 hours<br>Not specified<br>Directly; after 1 hour; after 2 hours                                                       | Directly; after 1 hour; after 8 hours<br>Not specified<br>Directly; after 1 hour; after 8 hours                                                                                                                                                                                                                                      | Directly; after 1 hour; after 8 hours<br>Every 10 minutes<br>Directly; after 30 minutes; 1 hour; 2 hours; 8 hours                                                                                  |
|                                                        | <b>MEOWS score performed</b>                                                                          | Yes                                                                                                                       | No                                                                                                                                                    | No                                                                                                                                                    | No                                                                                                                                                                                                                                                                                                                                   | Not specified                                                                                                                                                                                      |
|                                                        | <b>Follow up in severe PPH</b>                                                                        | - Blood exam (Hb, Ht, Tr, INR, fibrinogen)<br>- Performed a day later<br>- Discharge <b>not specified</b>                 | - Blood exam ( <b>not specified</b> )<br>- Performed same day<br>- Discharge <b>not specified</b>                                                     | - Blood exam ( <b>not specified</b> )<br>- Performed a day later<br>- Discharge <b>not specified</b>                                                  | - Blood exam ( <b>not specified</b> )<br>- Performed same day<br>- Discharge <b>not specified</b>                                                                                                                                                                                                                                    | - Blood exam (Hb, Ht, Tr, INR, APTT, PT fibrinogen, electrolytes, creatinine and liver enzymes)<br>- Performed 4 hours later and 24 hours later<br>- Discharge (by doctor) after at least 24 hours |
|                                                        | <b>PPH-box in delivery room</b>                                                                       | Yes                                                                                                                       | No                                                                                                                                                    | Yes                                                                                                                                                   | No                                                                                                                                                                                                                                                                                                                                   | Yes, should always be                                                                                                                                                                              |
| <b>PPH-checklists or flow charts in delivery rooms</b> | Yes                                                                                                   | No                                                                                                                        | Yes                                                                                                                                                   | No                                                                                                                                                    | Yes, should always be                                                                                                                                                                                                                                                                                                                |                                                                                                                                                                                                    |
